# Supplementary material for: Potential Future Alternative Resources for Rare Earth Elements: Opportunities and Challenges
Source: Preprints.org preprint supplement (doi:10.20944/preprints202301.0523.v1), 2023-01-28
Supplement: Supplementary file 1 [file supplementary]

To  
The Editor  
Minerals

Dear Professor

Kindly find my manuscript entitled "*Potential Future Alternative Resources for Rare Earth Elements: Opportunities and Challenges*" for a possible publication in Minerals. This manuscript is the first of its kind which brings out a summary of the primary, and secondary, REE deposits, and a comprehensive report on alternative REE resources and their potential to meet the current and future demand.

I hope that the manuscript is up to the journal standard and will be accepted for publication.

Regards

V. Balaram
